# Supplementary figures and images for: Sex Dimorphism in Outcome of Trauma Patients Presenting with Severe Shock: A Multicenter Cohort Study
Source: MDPI journal article supplement (doi:10.3390/jcm12113701), 2023-05-26

## Supplemental Figure

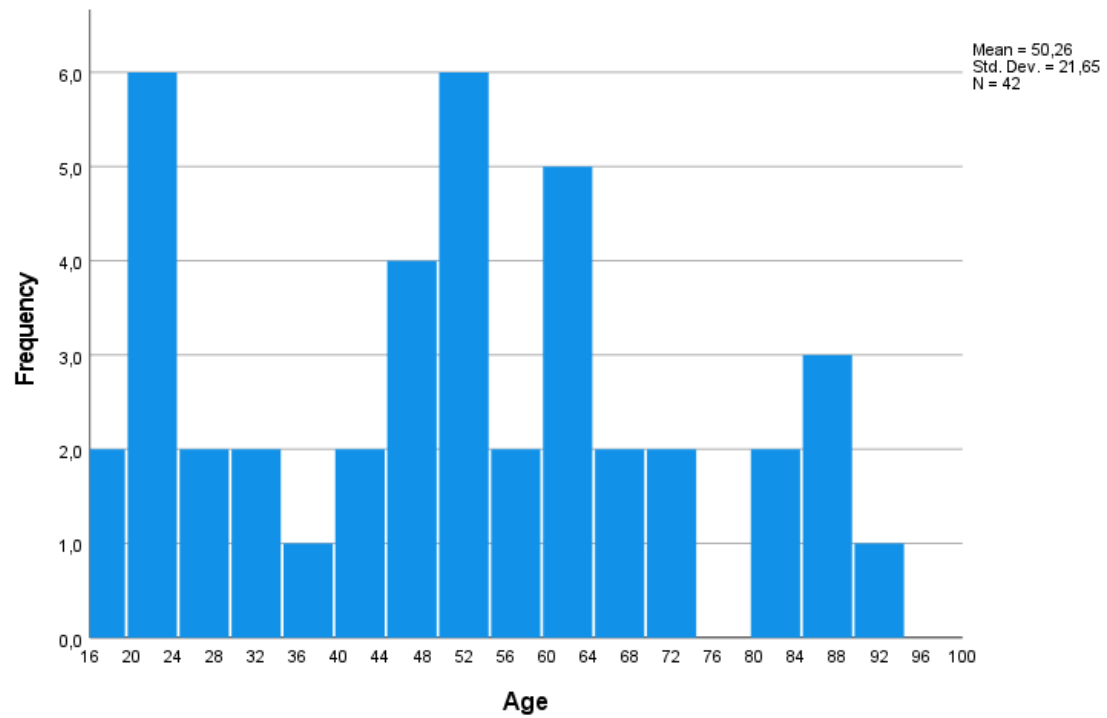

Figure S1. Distribution of female sex regarding age.

Supplement: s1 [file s1]
